# Supplementary material for: Terbium alginate encapsulated CsPbI3@Pb-MOF: a ratiometric fluorescent bead for detection and adsorption of Fe3+
Source: Royal Society of Chemistry journal article supplement (doi:10.1039/d3dt04187e), 2024-01-01
Supplement: d3dt04187e1.pdf [file d3dt04187e1.pdf]

## Supporting information

Terbium alginate encapsulated CsPbI<sub>3</sub>@Pb-MOF: A ratiometric fluorescent bead for detection and adsorption of Fe<sup>3+</sup>

Yangwen Hou<sup>a</sup>, Hua Feng<sup>b</sup>, Jingting He<sup>a</sup>, Fanfei Meng<sup>b</sup>, Jing Sun<sup>b</sup>, Xiao Li<sup>b</sup>, Xinlong Wang<sup>c</sup>, Zhongmin Su<sup>b,d,\*</sup>, Chunyi Sun<sup>c,\*</sup>

<sup>a</sup>School of Materials Science and Engineering, Changchun University of Science and Technology, Changchun 130022 Jilin, China

<sup>b</sup>Jilin Provincial Science and Technology Innovation Center of Optical Materials and Chemistry, School of Chemistry and Environmental Engineering, Changchun University of Science and Technology Changchun, Changchun, 130022 Jilin, China

<sup>c</sup>Key Laboratory of Polyoxometalate Science of Ministry of Education, Northeast Normal University, Changchun, 130024 Jilin, China

<sup>d</sup>State Key Laboratory of Supramolecular Structure and Materials, Institute of Theoretical Chemistry, College of Chemistry, Jilin University, Changchun, 130021 Jilin, China

\* Corresponding author.

E-mail addresses: zmsu@nenu.edu.cn (Z. Su), suncy009@nenu.edu.cn (C. Sun).

### 1. Experimental section

#### 1.1 FL detection of Fe<sup>3+</sup>

To measure sensitivity, a mixture of 50 mg CsPbI<sub>3</sub>@Pb-MOF@Tb-AG and varying concentrations of Fe<sup>3+</sup> (ranging from 0 to 90 μM) was prepared. Subsequently, fluorescence spectra were recorded using an excitation wavelength of 448 nm. To determine probe selectivity, various Ag<sup>+</sup>, Na<sup>+</sup>, K<sup>+</sup>, Cd<sup>+</sup>, Ca<sup>2+</sup>, Cu<sup>2+</sup>, Ni<sup>2+</sup>, Co<sup>2+</sup>, Mn<sup>2+</sup>, Zn<sup>2+</sup>, Mg<sup>2+</sup>, Ba<sup>2+</sup>, Pb<sup>2+</sup>, Cd<sup>2+</sup>, Al<sup>3+</sup>, In<sup>3+</sup>, Cr<sup>3+</sup>, Br<sup>-</sup>, Cl<sup>-</sup>, SO<sub>4</sub><sup>2-</sup> and NO<sub>3</sub><sup>-</sup> ions including were prepared at a concentration of 50 μM. The solutions above and 50 μM of Fe<sup>3+</sup> solution were added to the mixture individually, and the changes in fluorescence were monitored.

#### 1.2 Adsorption experiments

Firstly, the dry sample (10 mg) is mixed with a Fe<sup>3+</sup> solution (20 mL, 400 mg/L) and magnetically stirred for 24 hours. Subsequently, the supernatant was collected for the ICP test.

#### 1.3 Characterization

X-ray diffraction analysis utilized a Rigaku Ultima IV diffractometer at 40 kV and 30 mA, employing Cu Kα radiation (λ = 1.5406 Å). We conducted scans from 5° to 60° 2θ, at 0.02° increments and 1-second dwell time per step. Photoluminescence spectra were acquired using a F98 spectrofluorometer, under 365 nm excitation and 5 nm slit widths, across a 500-700 nm wavelength range at ambient temperature. Energy-

dispersive X-ray spectroscopy (EDS) and scanning electron microscopy (SEM) images were obtained with a Hitachi TM-1000 tabletop SEM, setting the electron beam to 15 keV, a 35° take-off angle, a 10 mm working distance, and 60 seconds acquisition time. Transmission electron microscopy (TEM) and high-resolution TEM (HRTEM) analyses employed a JEOL JEM-2010 microscope at 200 kV, achieving a 0.19 nm spatial resolution, using carbon-coated copper grids and a Gatan Orius CCD camera for image capture and DigitalMicrograph software for analysis. X-ray photoelectron spectroscopy (XPS) was performed on an Escalab 250, using monochromatic Al K $\alpha$  radiation (1486.7 eV), with a 45° take-off angle, electron flood gun for charge compensation, and C 1s calibration at 284.8 eV. High-resolution and survey scans utilized 20 eV and 160 eV pass energies, respectively, with three scans and a 0.1 eV resolution, employing Lorentzian-Gaussian mix fitting (20% Lorentzian). UV-Vis diffuse reflectance spectra were characterized on a TU-1900 spectrophotometer, spanning 200-800 nm, using barium sulfate as a standard. Fluorescence lifetimes were measured with an Edinburgh Instruments FLS980 spectrofluorometer, using a 375 nm, 100 ps pulsed diode laser, covering a 400-800 nm detection range with 5 ps resolution, and setting data collection to 5 minutes per sample.

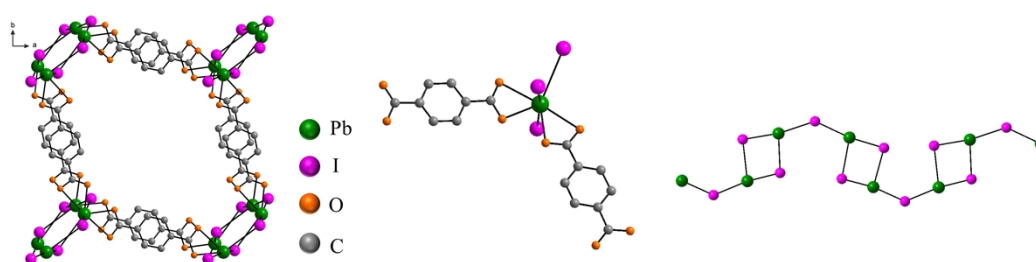

Fig.S1. Crystallographic view of PbI-MOF.

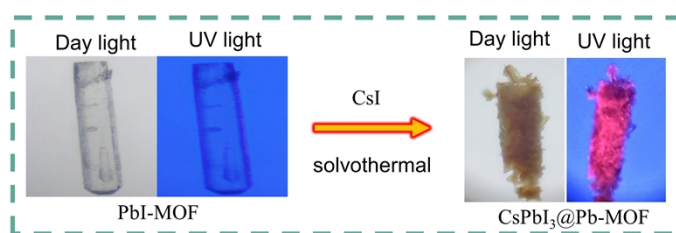

Fig.S2. Photographs of CsPbI<sub>3</sub>@Pb-MOF under daylight and UV light (365 nm).

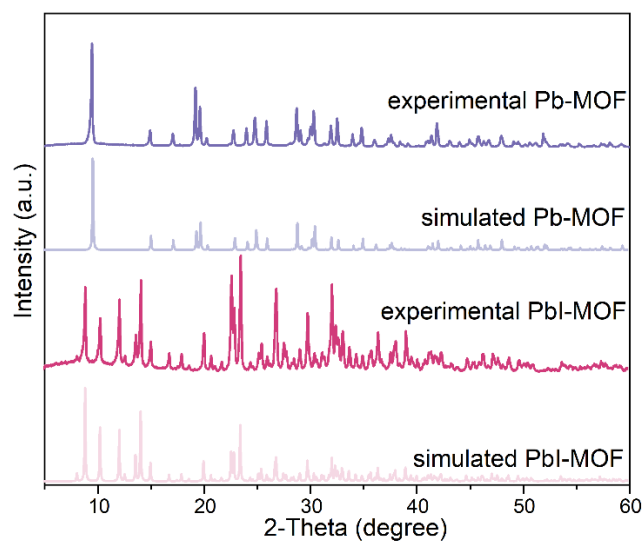

Fig.S3. PXRD pattern of PbI-MOF and Pb-MOF.

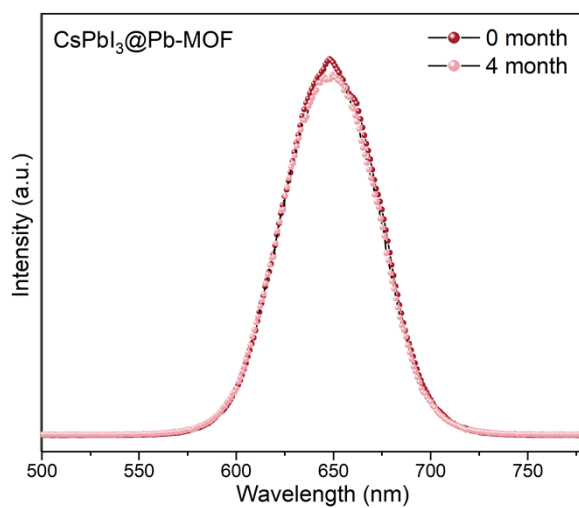

Fig.S4. PL spectra of CsPbI<sub>3</sub>@Pb-MOF in water at different times.

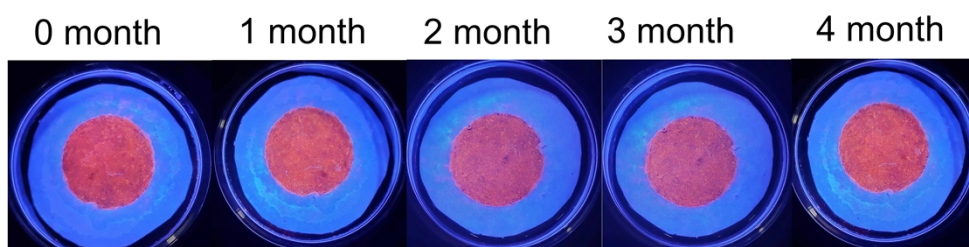

Fig.S5. The image displays CsPbI<sub>3</sub>@Pb-MOF samples in water at different times.

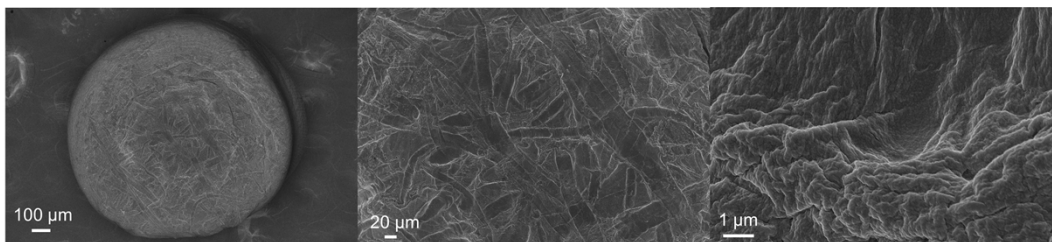

Fig. S6. SEM of the pure Tb-AG.

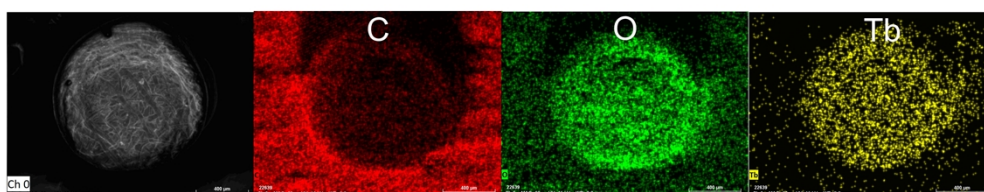

Fig. S7. EDS element mapping of the pure Tb-AG.

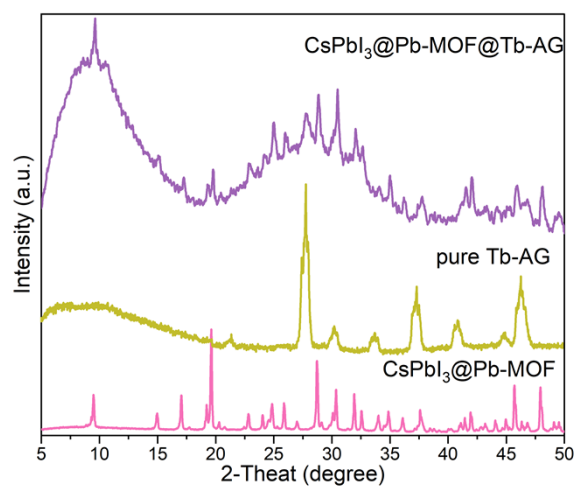

Fig.S8. PXRD pattern of samples.

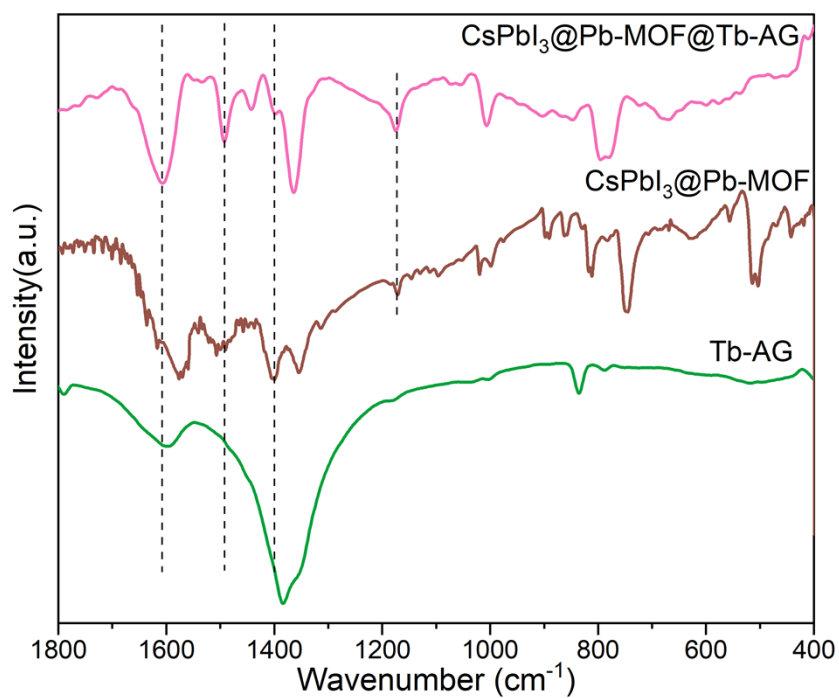

Fig.S9. FTIR of samples.

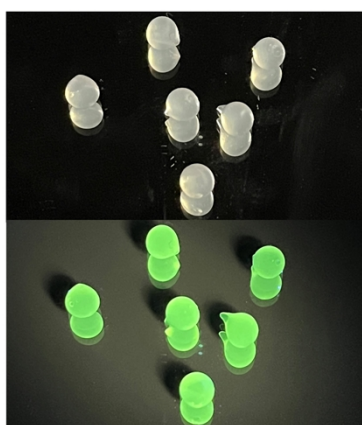

Fig.S10. The image displays Tb-AG samples under two conditions: daylight and UV light irradiation.

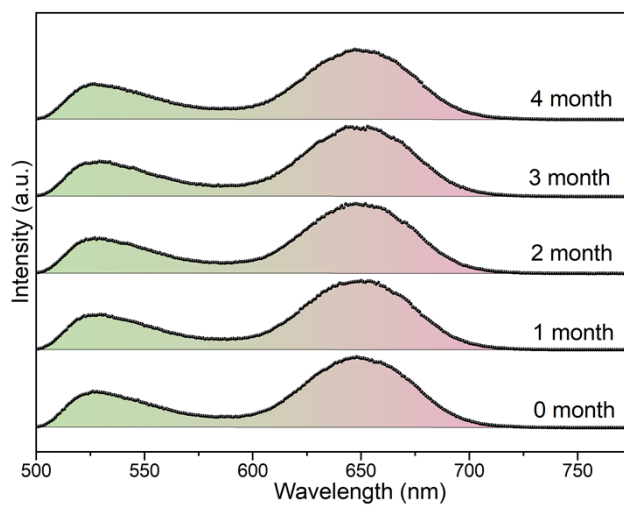

Fig.S11. PL spectra of CsPbI<sub>3</sub>@Pb-MOF@Tb-AG in water at different times.

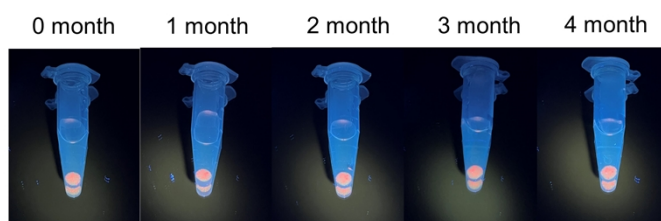

Fig.S12. The image displays CsPbI<sub>3</sub>@Pb-MOF@Tb-AG samples in water at different times.

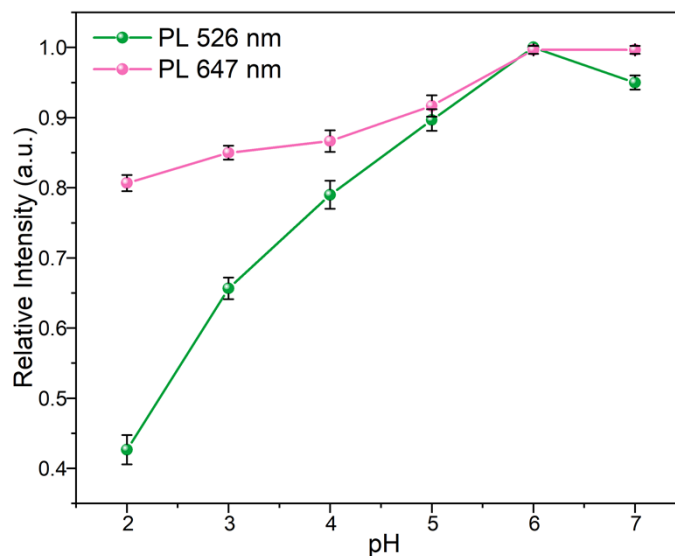

Fig. S13. The quenching efficiency of CsPbI<sub>3</sub>@Pb-MOF@Tb-AG for Fe<sup>3+</sup> (10 μM) under the different pH conditions.

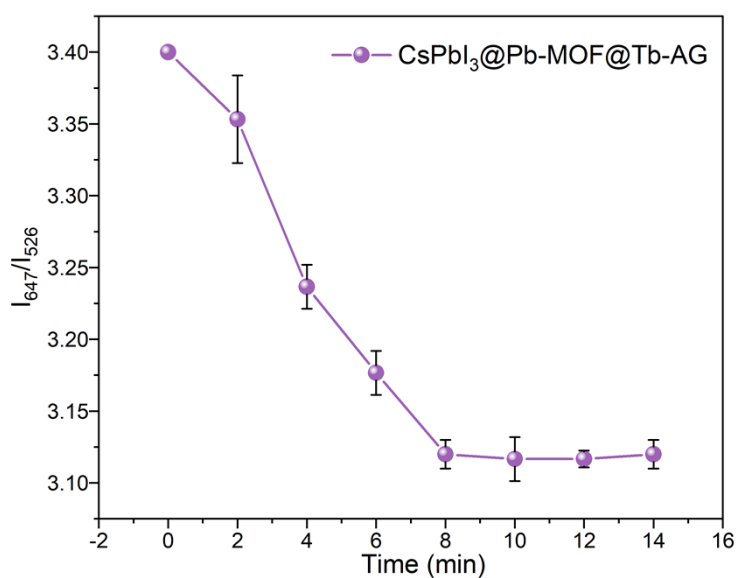

Fig. S14. Time-dependent fluorescence intensity of CsPbI<sub>3</sub>@Pb-MOF@Tb-AG upon addition of Fe<sup>3+</sup> (10 μM, pH=6).

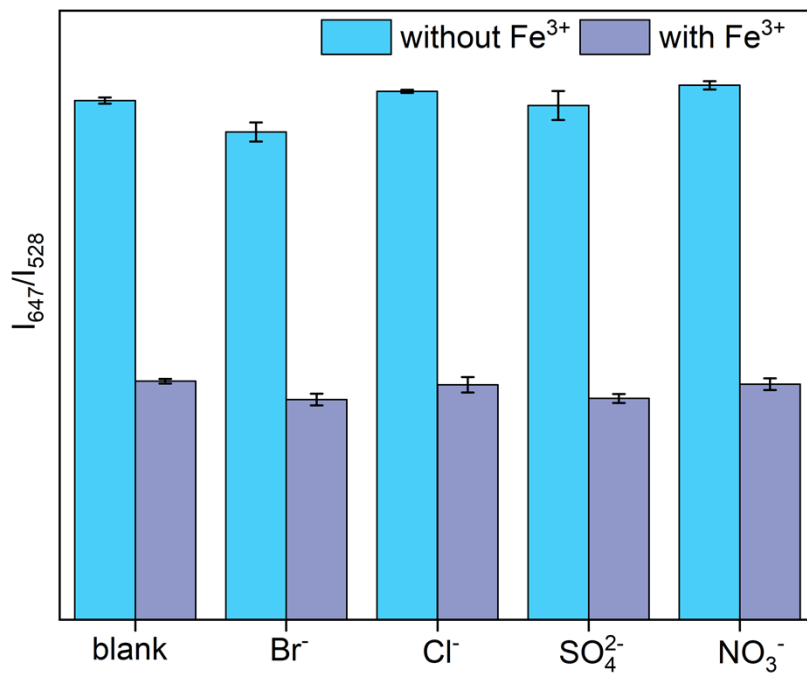

Fig.S15. Analysis of the impact of various anion on the relative fluorescence intensity ( $I_{647}/I_{528}$ ) of CsPbI<sub>3</sub>@Pb-MOF@Tb-AG, both with and without the presence of Fe<sup>3+</sup>.

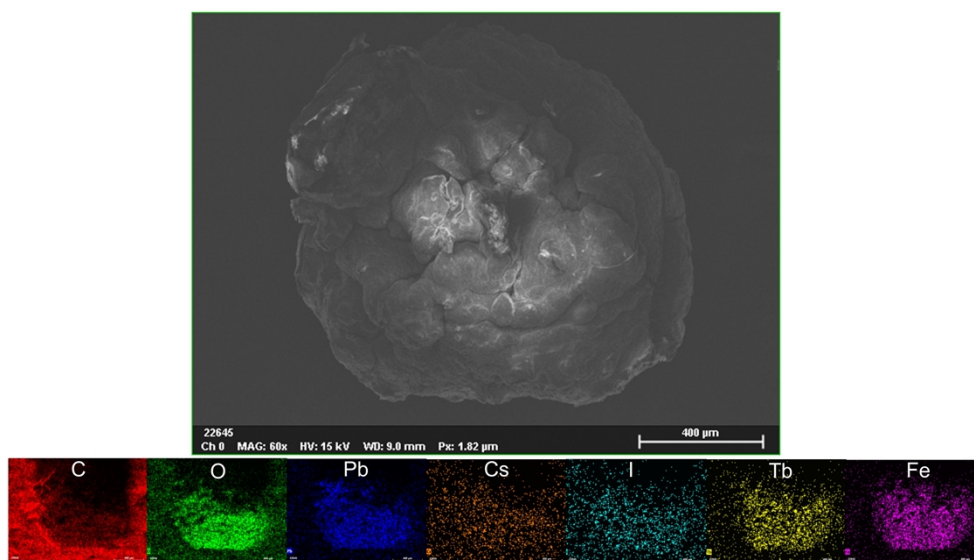

Fig.S16. SEM and EDS of CsPbI<sub>3</sub>@Pb-MOF@Tb-AG+Fe<sup>3+</sup>.

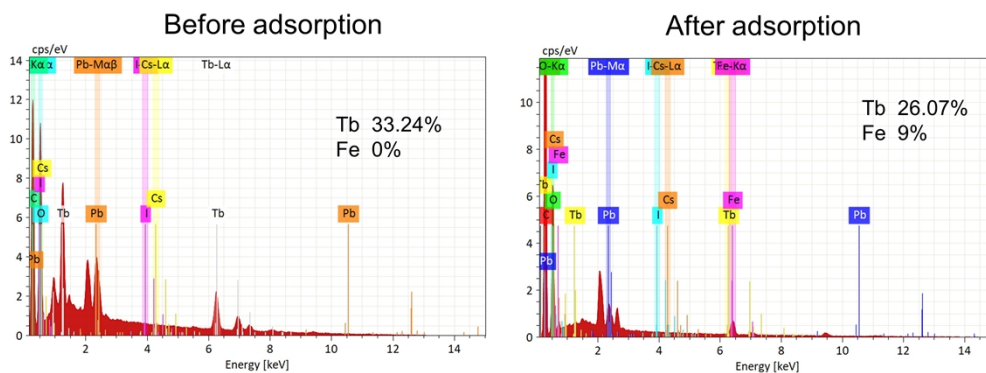

Fig.S17. EDS of CsPbI<sub>3</sub>@Pb-MOF@Tb-AG before and after adsorbing Fe<sup>3+</sup>.



Table S1. Time-resolved PL decay parameters of different samples under 448 nm excitation. The two-exponential decay curves were fitted using a non-linear least-squares method with a two-component decay law. The average lifetime ( $\tau_{av}$ ) was then determined using the equation:

$$\tau = \frac{\sum_{i=1}^{i=n} A_i \tau_i^2}{\sum_{i=1}^{i=n} A_i \tau_i}$$

| <b>Sample</b>                     | <b><math>\tau_1</math>(ns)</b> | <b><math>\tau_2</math>(ns)</b> | <b>X<sup>2</sup></b> | <b><math>\tau_{av}</math>(ns)</b> |
|-----------------------------------|--------------------------------|--------------------------------|----------------------|-----------------------------------|
| CsPbI <sub>3</sub> @PbI-MOF       | 15.34<br>(10.58%)              | 37.50<br>(89.42%)              | 1.103                | 35.15                             |
| CsPbI <sub>3</sub> @PbI-MOF@Tb-AG | 16.20<br>(17.26%)              | 47.48<br>(82.74%)              | 1.125                | 42.09                             |

Table S2. Comparison of the detection and adsorption of Fe<sup>3+</sup> ions using different Materials.

| Sensing materials                                       | Linear range ( $\mu\text{M}$ ) | LOD ( $\mu\text{M}$ ) | Adsorption capacity (mg/g) | Ref.      |
|---------------------------------------------------------|--------------------------------|-----------------------|----------------------------|-----------|
| Carbon dot                                              | 1-100                          | 0.32                  | -                          | 1         |
| N-doped Carbon dot                                      | 1-250                          | 0.52                  | -                          | 2         |
| Nitrogen-doped carbon dots                              | 2-25                           | 0.9                   | -                          | 3         |
| CsPbBr <sub>3</sub> @PSAA                               | 5-150                          | 2.2                   | -                          | 4         |
| SiO <sub>2</sub> @CsPbBr <sub>3</sub> @SiO <sub>2</sub> | 10-70                          | 3                     | -                          | 5         |
| Bone gelatin CsSnCl <sub>3</sub>                        | 0-2000                         | 8                     | -                          | 6         |
| Eu <sup>3+</sup> @Uio-66-CA                             | 0-250                          | 18.1                  | -                          | 7         |
| TiO <sub>2</sub> -banana cluster                        | -                              | -                     | 150                        | 8         |
| SiO <sub>2</sub> @Nap                                   | 0-125                          | 1.32                  | 79                         | 9         |
| PNIPAAm-CD hydrogel                                     | 1-1000                         | 0.27                  | 280.25                     | 10        |
| CsPbI <sub>3</sub> @Pb-MOF@Tb-AG                        | 0-90                           | 0.44                  | 325.4                      | This work |

Table S3. Time-resolved PL decay parameters of different samples under 448 nm excitation. The two-exponential decay curves were fitted using a non-linear least-squares method with a two-component decay law. The average lifetime ( $\tau_{av}$ ) was then determined using the equation:

$$\tau = \frac{\sum_{i=1}^{i=n} A_i \tau_i^2}{\sum_{i=1}^{i=n} A_i \tau_i}$$

| <b>Sample</b>                                | <b><math>\tau_1</math>(ns)</b> | <b><math>\tau_2</math>(ns)</b> | <b>X<sup>2</sup></b> | <b><math>\tau_{av}</math>(ns)</b> |
|----------------------------------------------|--------------------------------|--------------------------------|----------------------|-----------------------------------|
| CsPbI <sub>3</sub> @PbI-MOF@Tb-AG            | 16.20<br>(17.26%)              | 47.48<br>(82.74%)              | 1.125                | 42.09                             |
| CsPbI <sub>3</sub> @PbI-MOF@Tb-AG+20 $\mu$ M | 7.57<br>(3.41%)                | 37.97<br>(96.59%)              | 1.135                | 39.25                             |
| CsPbI <sub>3</sub> @PbI-MOF@Tb-AG+40 $\mu$ M | 7.17<br>(10.38%)               | 35.19<br>(89.62%)              | 1.194                | 32.28                             |

## References

- [1] J. Shen, S. Shang, X. Chen, D. Wang, Y. Cai, *Mater. Sci. Eng. C.*, 2017, **76**, 856–864.
- [2] Y. Song, C. Zhu, J. Song, H. Li, D. Du, Y. Lin, *ACS Appl. Mater. Inter.*, 2017, **9**, 7399–7405.
- [3] R. Atchudan, T.N.J.I. Edison, K.R. Aseer, S. Perumal, N. Karthik, Y.R. Lee, *Biosens. Bioelectron.*, 2018, **99**, 303–311.
- [4] M. Chen, J. An, Y. Hu, R. Chen, Y. Lyu, N. Hu, M. Luo, M. Yuan, Y. Liu, *Sensor Actuat B-Chem.*, 2020, **325**, 128809.
- [5] X.-H. Tan, G.-B. Huang, Z.-X. Cai, F.-M. Li, Y.-M. Zhou, M.-S. Zhang, *J Anal Test.*, 2021, **5**, 40–50.
- [6] D. Gao, Y. Zhang, B. Lyu, X. Guo, Y. Hou, J. Ma, B. Yu, S. Chen, *Inorg. Chem.*, 2022, **61**, 6547–6554.
- [7] Y. Fan, X. Sun, W. Zhang, J. Liu, *Colloids Surf. A Physicochem. Eng. Asp.*, 2023, **669**, 131513.
- [8] S. Chatterjee, H. Gohil, A.R. Paital, *ChemistrySelect.*, 2017, **2**, 5348–5359.
- [9] C. Wang, T. Hu, Z. Wen, J. Zhou, X. Wang, Q. Wu, C. Wang, *J. Colloid. Interf. Sci.*, 2018, **521**, 33–41.
- [10] D. Zhang, X. Tian, H. Li, Y. Zhao, L. Chen, *Colloids Surf. A Physicochem. Eng. Asp.*, 2021, **608**, 125563.
